# Supplementary material for: Controllable Schottky barriers and contact types of BN intercalation layers in graphene/MoSi2As4vdW heterostructuresviaapplying an external electrical field
Source: Royal Society of Chemistry journal article supplement (doi:10.1039/d2cp02011d), 2022-01-01
Supplement: d2cp02011d1.pdf [file d2cp02011d1.pdf]

**Supporting Information for**  
**Controllable Schottky Barriers and Contact Types of BN Intercalation Layer in**  
**Graphene/MoSi<sub>2</sub>As<sub>4</sub> vdW Heterostructures via Applying External Electrical**  
**Field**

Yuan Guo,<sup>a</sup> Yujing Dong,<sup>a</sup> Xiaolin Cai,<sup>c</sup> Liangliang Liu,<sup>a,d</sup> and Yu Jia<sup>\*a,b,d</sup>

<sup>a</sup> *Key Laboratory for Special Functional Materials of Ministry of Education, and School of Materials Science and Engineering, Henan University, Kaifeng 475004, Henan, China*

<sup>b</sup> *International Laboratory for Quantum Functional Materials of Henan, and School of Physics, Zhengzhou University, Zhengzhou 450001, Henan, China*

<sup>c</sup> *School of Physics and Electronic Information Engineering, Henan Polytechnic University, Jiaozuo 454000, China*

<sup>d</sup> *Joint Center for Theoretical Physics, Henan University, Kaifeng 475004, Henan, China*

**Corresponding Authors:**

\*E-mail: [jiayu@henu.edu.cn](mailto:jiayu@henu.edu.cn)

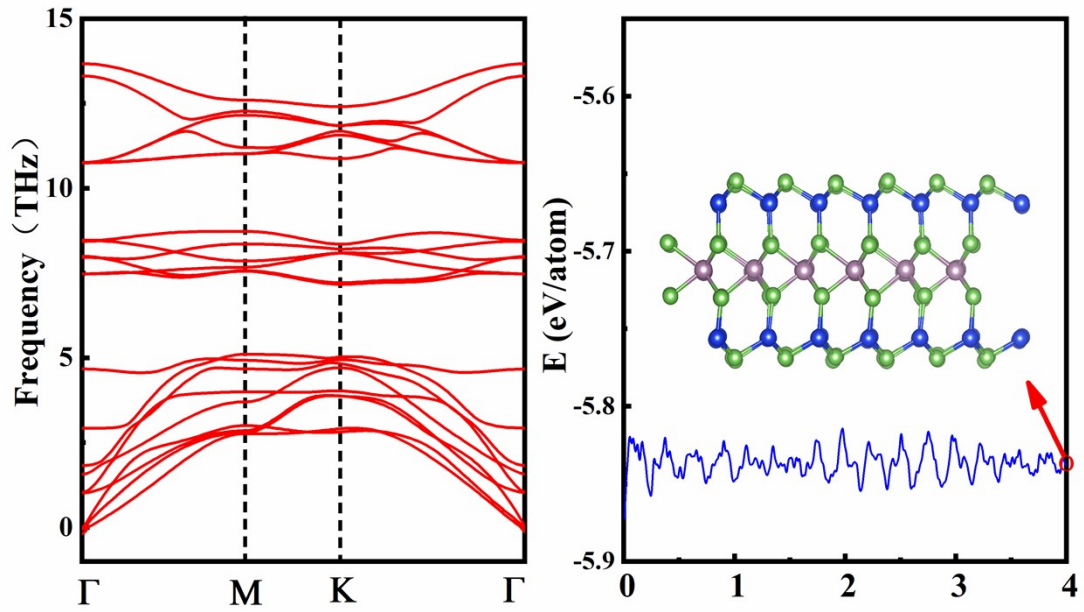

Fig S1. The calculated phonon dispersion curves (left) and ab initio molecular dynamics (AIMD) simulations (right) of MoSi<sub>2</sub>As<sub>4</sub> monolayer.

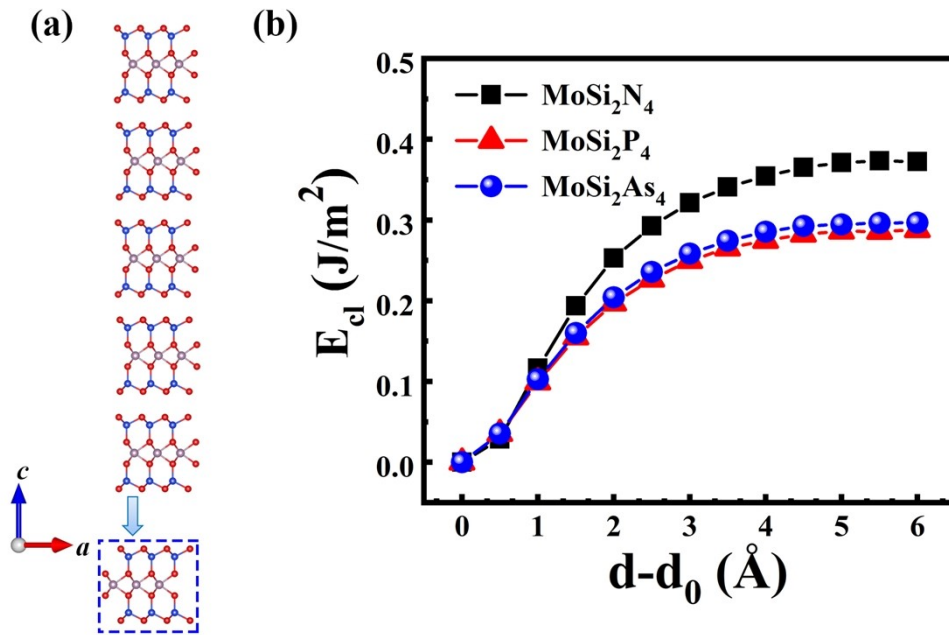

Fig S2. (a)The exfoliation of a layer from the surface of a bulk material. (b) Monolayer exfoliation energies for MoSi<sub>2</sub>Z<sub>4</sub> (Z=N, P, As), where the black, red and blue dots-lines represent for MoSi<sub>2</sub>N<sub>4</sub>, MoSi<sub>2</sub>P<sub>4</sub> and MoSi<sub>2</sub>As<sub>4</sub>, respectively.

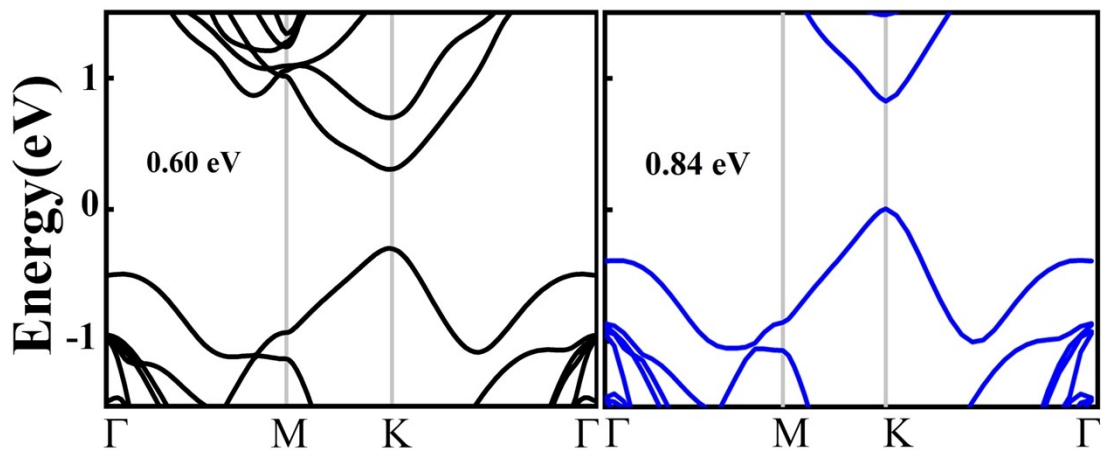

Fig S3. The calculated band structures by PBE (left) and HSE06 (right) methods for MoSi<sub>2</sub>As<sub>4</sub> monolayer.

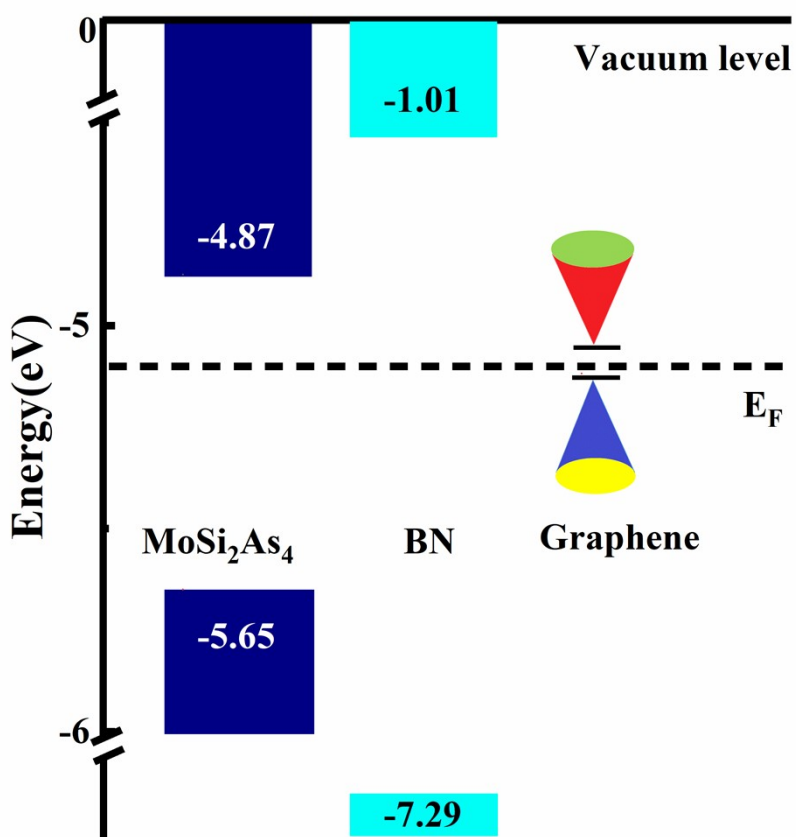

Fig S4. The band alignment of Graphene/BN/MoSi<sub>2</sub>As<sub>4</sub> heterostructure calculated by HSE06 functional.
